# Supplementary material for: The Antitumor Activity of Sodium Selenite Alone and in Combination with Gemcitabine in Pancreatic Cancer: An In Vitro and In Vivo Study
Source: MDPI journal article supplement (doi:10.3390/cancers13133169), 2021-06-25
Supplement: s1 [file s1]

# PANC-1

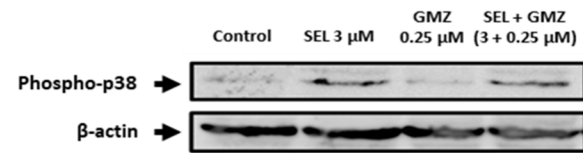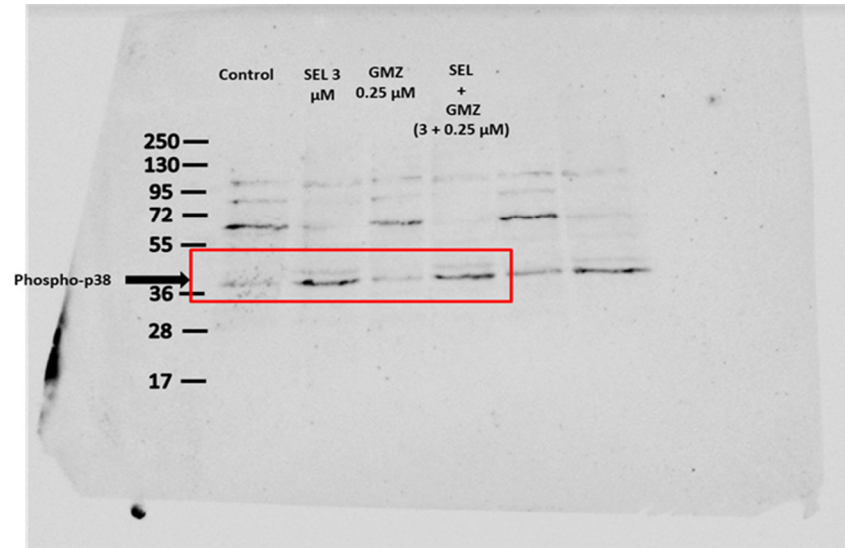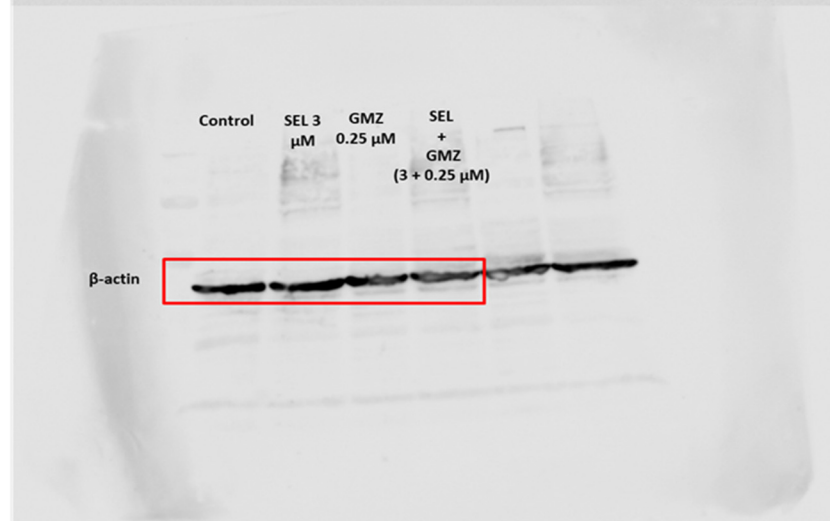

# Pan02

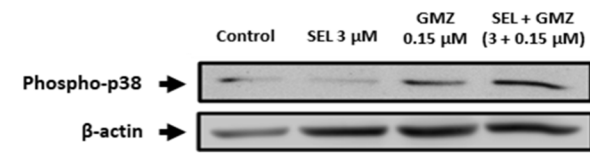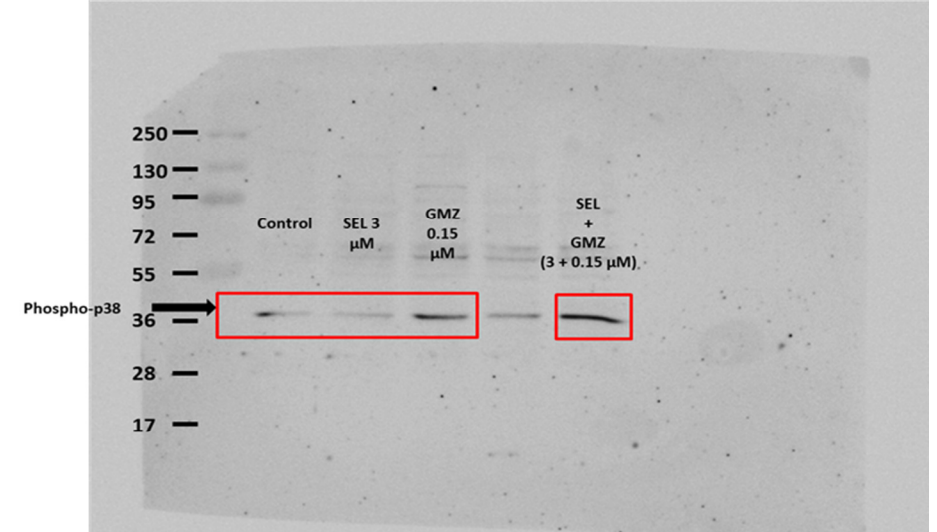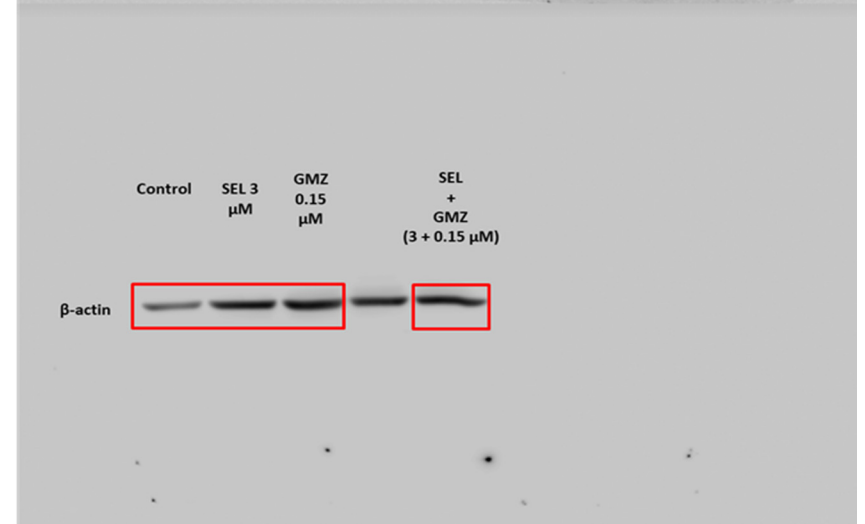

**Original Western Blots of Figure 2C.** Cells exposed to different treatments (72 h) were collected, centrifuged, and total proteins were extracted with RIPA lysis buffer (Sigma-Aldrich, Saint Louis, Missouri) to determine protein concentration using Bradford. For electrophoresis, 40 µg of proteins from each sample were heated at 95 °C for 5 min and separated in 10% SDS-PAGE gel. Fractions were transferred to a nitrocellulose membrane (45 µm pore size) (*Millipore*), blocked in 5% milk in PBS supplemented with 0.1% Tween-20 (Bio-Rad) for 1 hour and incubated with the anti-p38 rabbit primary antibody (1:1000) (Cell Signaling Technologies, Spain) overnight at 4 °C. Then, a secondary antibody (Sigma-Aldrich, Saint Louis, Missouri) was added (1:5000). The membranes were revealed by chemiluminescence (Amersham Biosciences, USA). β-actin detection (Sigma-Aldrich, Saint Louis, Missouri) served as an internal control.
