# Supplementary material for: The Antitumor Activity of Sodium Selenite Alone and in Combination with Gemcitabine in Pancreatic Cancer: An In Vitro and In Vivo Study
Source: MDPI journal article supplement (doi:10.3390/cancers13133169), 2021-06-25
Supplement: s1 [file s1]

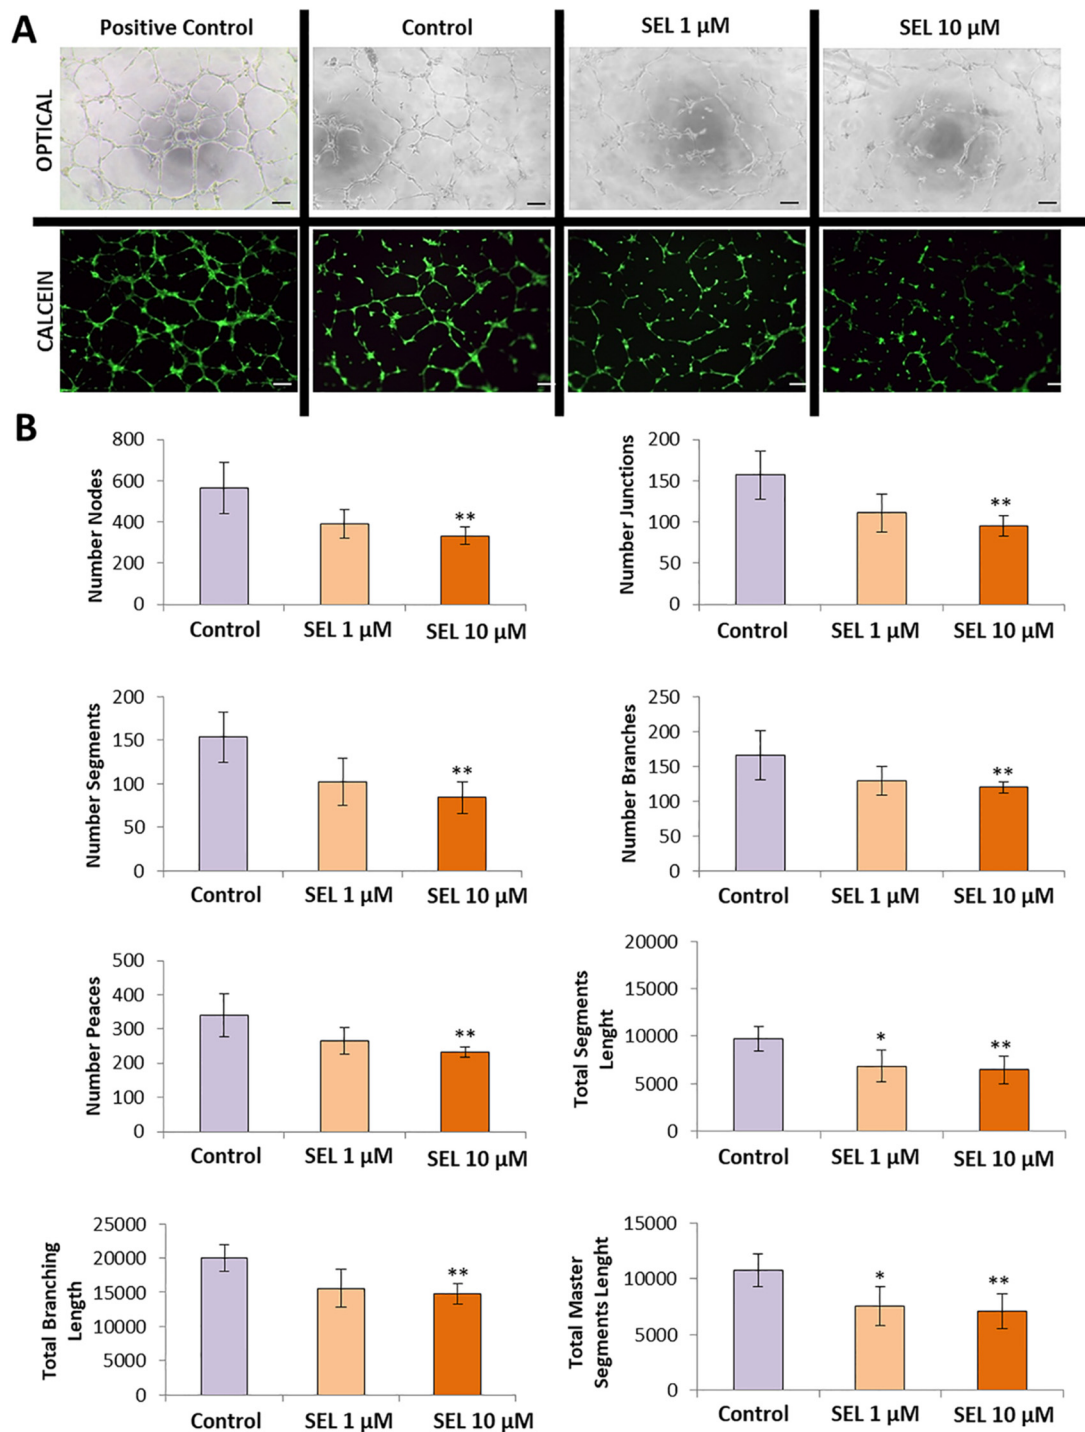

**Figure S1.** Effect of pancreatic cancer cells-conditioned media after sodium selenite treatment on angiogenesis. (A) Representative optical microscopy and calcein images of HUVECs exposed to conditioned media obtained from pancreatic cancer cells treated with sodium selenite (1 and 10 mM). (B) Graphical representation of different angiogenesis parameters measured on the calcein images including formation of nodes, branches, segments or junctions. From what can be seen, selenite at a dose of 10 clearly inhibits angiogenesis in HUVEC cells. Data are presented as the mean  $\pm$  standard deviation of three independent experiments; \*  $P < 0.05$  and \*\*  $P < 0.01$  vs. respective control group.
